# Supplementary material for: The Pregnancy and EARly Life study (PEARL) - a longitudinal study to understand how gut microbes contribute to maintaining health during pregnancy and early life
Source: Springer Nature journal article supplement (doi:10.1186/s12887-021-02835-5), 2021-08-24
Supplement: MOESM4 [file 19595030]

The **PEARL** Study  
*Pregnancy and EARLY Life*

---

*Newborn 8 Months Post Birth Questionnaire*

---

This questionnaire has been modified from the approved Centre for Disease Control and Prevention (CDCP) questionnaire and has been designed to ask questions only relevant to this study for your convenience. CDCP have given their permission to use this modified version their Questionnaire for the purposes of this study and have agreed for Section C: Additional questions to be added.

**SECTION A: BABY'S FEEDING AND HEALTH**

1. In the past 14 days, how often was your baby fed each food listed below? Include feedings by everyone who feeds the baby and include snacks and night-time feedings.

If your baby was fed the food once a day or more, write the number of feedings per day in the first column. If your baby was fed the food less than once a day, write the number of feedings per week in the second column.

Fill in only one column for each item. If your baby was not fed the food at all during the past 7 days, write 0 in the second column.

|                                                                      | FEEDINGS PER DAY | FEEDINGS PER WEEK |
|----------------------------------------------------------------------|------------------|-------------------|
| Breast milk                                                          | _____            | _____             |
| Formula (write which type of formula below)                          | _____            | _____             |
| .....                                                                |                  |                   |
| Cow's milk                                                           | _____            | _____             |
| Other milk: soy milk, rice milk, goat milk, etc                      | _____            | _____             |
| Other dairy foods: e.g. yoghurt,<br>cheese, ice cream, pudding, etc. | _____            | _____             |

Participant Study ID \_\_\_\_\_

Baby Study ID \_\_\_\_\_

|                                                                                                       |       |       |
|-------------------------------------------------------------------------------------------------------|-------|-------|
| Other soy foods: e.g. tofu, frozen soy desserts, etc                                                  | _____ | _____ |
| 100% fruit or 100% vegetable juice                                                                    | _____ | _____ |
| Sweet drinks: e.g. juice drinks, soft drinks,<br>soda, sweet tea, etc.                                | _____ | _____ |
| Baby cereal                                                                                           | _____ | _____ |
| Other cereals & starches: e.g. breakfast cereals,<br>teething biscuits, crackers, breads, pasta, rice | _____ | _____ |
| Fruit                                                                                                 | _____ | _____ |
| Vegetables                                                                                            | _____ | _____ |
| French fries                                                                                          | _____ | _____ |
| Meat, chicken, combination dinners                                                                    | _____ | _____ |
| Fish or shellfish                                                                                     | _____ | _____ |
| Peanut butter, other peanut foods, or nuts                                                            | _____ | _____ |
| Eggs                                                                                                  | _____ | _____ |
| Sweet foods: e.g. sweets, cookies, cake, etc.                                                         | _____ | _____ |
| Other (Please specify below)                                                                          | _____ | _____ |

.....

**Section A-2 Health**

**2. Which of the following problems did your baby have during the past 4 weeks? (PLEASE 'X' ALL THAT APPLY)**

- Fever .....
- Runny nose or cold .....
- Diarrhoea .....
- Respiratory Syncytial Virus (RSV) .....
- Vomiting .....
- Cough or wheeze .....

- Ear infection .....
- Asthma .....
- Colic .....
- Food allergy .....
- Fussy or irritable .....
- Eczema (atopic dermatitis) .....
- Reflux .....
- None of these .....

3. Was your baby given any medication (e.g. antibiotics), including over-the-counter medication in the past 4 weeks? If so please list details below

.....

4. Was your baby given any supplements (e.g. probiotics, vitamin drops) in the past 4 weeks? If so please list details below

.....

5. How many stools (dirty nappies) does your baby usually have in a 24-hour period? If less than one a day, how many days usually pass between stools?

\_\_\_\_\_ NUMBER OF STOOLS IN 24 HOURS **OR** ONE STOOL EVERY \_\_\_\_\_ DAYS

6. How would you describe your baby's stool in the past 7 days? (PLEASE 'X' ALL THAT APPLY)

Hard ....    Formed ....    Soft ....    Semi-watery ....    Watery ....

7. Has your baby been hospitalised for any reason or has your baby been taken to a hospital for any outpatient procedure or surgery in the past 4 weeks?

Yes ....    No ....

8. How many nights was your baby in the hospital for the most recent problem? (Write in 0 if your baby did not stay overnight.) \_\_\_\_\_ NIGHTS

9. How many teeth does your baby have now? (Write in 0 if none.)

\_\_\_\_\_ NUMBER OF TEETH

**SECTION C: FOOD ALLERGY SECTION**

**10.** Has your baby ever had problems caused by food, such as an allergic reaction, sensitivity, or intolerance?

Yes ....       No ....       (IF **NO** GO TO QUESTION 18).

**11.** What were the problems caused by (PLEASE 'X' ALL THAT APPLY)

- Food your baby ate (including infant formula)  
.....
- Food your baby was exposed to through breast milk because of something you ate  
.....

**12.** How old was your baby the first time he or she had a problem with food? (Include food your baby reacted to through breast milk.)

1 month or less ....     2 months ....     3 months ....     4 months ....     5 months ....   
6 months ....     7 months ....     8 months ....

**13.** Did you take your baby to a medical doctor because of these problems with food?

Yes ....       No ....

**14.** If your baby was tested or examined for food allergy, what method was used? (PLEASE 'X' ALL THAT APPLY)

If your baby was not tested or examined for food allergy, 'X' here  and go to Question 7.

- Parents' description of symptoms.....
- A skin test .....
- A blood test such as RAST, or CAP-RAST .....
- An oesophageal or intestinal study .....
- Food elimination (withdrawal of the specific food to see if symptoms disappeared) .....
- Food challenge (introduction of a specific food to see if symptoms reappeared) .....

- Other (PLEASE SPECIFY below) .....

.....

**15. Was your baby diagnosed by a medical doctor as having an allergy to any food?**

Yes ....       No ....

**16. What symptoms of a problem with food has your baby had? (PLEASE 'X' ALL THAT APPLY)**

- |                                                 |                                                           |                                                     |
|-------------------------------------------------|-----------------------------------------------------------|-----------------------------------------------------|
| Congestion .... <input type="checkbox"/>        | Gassiness or stomach cramps .... <input type="checkbox"/> | Runny nose .... <input type="checkbox"/>            |
| Vomiting .... <input type="checkbox"/>          | Asthma or wheezing .... <input type="checkbox"/>          | Diarrhoea .... <input type="checkbox"/>             |
| Trouble breathing .... <input type="checkbox"/> | Constipation .... <input type="checkbox"/>                | Coughing .... <input type="checkbox"/>              |
| Colic .... <input type="checkbox"/>             | Swollen eyes and or lips .... <input type="checkbox"/>    | Irritability .... <input type="checkbox"/>          |
| Hives or welts .... <input type="checkbox"/>    | Sleeplessness .... <input type="checkbox"/>               | Flushing .... <input type="checkbox"/>              |
| Blood in stool .... <input type="checkbox"/>    | Skin rash or eczema .... <input type="checkbox"/>         | Loss of consciousness .... <input type="checkbox"/> |

**17. Please indicate which foods caused a problem for your baby (PLEASE 'X' ALL THAT APPLY)**

- Cows' milk or other dairy products  
(including infant formula made with cows' milk .....
- Soy milk or other soy food (including infant formula made with soy) .....
- Eggs .....
- Peanuts, peanut butter, or peanut oil .....
- Nuts (such as, almonds, pecans, walnuts) .....
- Sesame seed, tahini, or sesame seed oil .....
- Fish, shellfish, or other seafood .....
- Beef, chicken or turkey.....
- Wheat, gluten, or wheat starch .....
- Other grain or cereal (such as oats, barley) .....
- Fruit or fruit juice .....
- Vegetables .....
- Other food (PLEASE SPECIFY below)

**SECTION D: ADDITIONAL QUESTIONS**

**18.** How often do you typically bathe (full body) your infant?

Daily  Every other day  A few times per week  Once per week

Other: Please list \_\_\_\_\_

**19.** What skin care products and how often do you use on your baby (full body, not including nappy area)?

| <u>Product</u>                                           | <u>Time</u>                    | <u>Response (1 – 4)</u> |
|----------------------------------------------------------|--------------------------------|-------------------------|
| <b>A,</b> Cleansers (washes/soap bars/liquid soaps)      | <b>1,</b> Daily                | A =                     |
| <b>B,</b> Moisturizers (lotions / creams / balms / oils) | <b>2,</b> Every Other Day      | B =                     |
| <b>C,</b> Water cleansing only                           | <b>3,</b> A Few Times Per Week | C =                     |
|                                                          | <b>4,</b> Once a week          |                         |

**20.** Is your baby enrolled in a day-care/nursery environment outside your home?

Yes  If yes, how many days per week \_\_\_\_\_ No

**21.** Are there any pets currently living in the house?

Yes  No

**22.** Date you completed this form: Day \_\_\_\_\_ Month \_\_\_\_\_ Year \_\_\_\_\_

***THANK YOU. Upon completion, please keep in a safe place and hand to designated staff when your frozen samples are collected, unless you are completing this form online.***
