# Supplementary material for: The Pregnancy and EARly Life study (PEARL) - a longitudinal study to understand how gut microbes contribute to maintaining health during pregnancy and early life
Source: Springer Nature journal article supplement (doi:10.1186/s12887-021-02835-5), 2021-08-24
Supplement: MOESM11 [file 19595030]

The **PEARL** Study  
*Pregnancy and EARly Life*

---

*Participant Dietary Preferences and Perceptions Questionnaire 4 Months Post Birth. **Optional.***

---

Thank you for participating in this research. This is a questionnaire about your dietary preferences and how you understand your health needs during and after pregnancy.

When answering the questions, please remember that all information you provide will be anonymised.

Please answer the questions by putting a tick in the appropriate box.

Firstly, a few questions about you:

1. How many portions of fruit (fresh, tinned and frozen) did you eat yesterday? An apple, or an orange, a banana or a cupful of grapes counts as a portion

2. How many portions of vegetables (fresh, tinned or frozen) did you eat yesterday? 80 grams or a cupful of vegetables counts as a portion. Beans, peas, tomatoes, seeds and nuts should be counted but not potatoes

3. Would you say your fruit and vegetable consumption was?

Very low     a little low     about right     a little high     Very high

4. Have you changed your fruit and vegetable consumption since you became pregnant?

Yes

No

5. Please tick one box that most reflects your thoughts.

For me eating 5 portions of fruit and vegetables per day is:

A). Not at all pleasant

Very pleasant

|                          |                          |                          |                          |                          |
|--------------------------|--------------------------|--------------------------|--------------------------|--------------------------|
| 1                        | 2                        | 3                        | 4                        | 5                        |
| <input type="checkbox"/> | <input type="checkbox"/> | <input type="checkbox"/> | <input type="checkbox"/> | <input type="checkbox"/> |

B). Not very convenient

Very convenient

|                          |                          |                          |                          |                          |
|--------------------------|--------------------------|--------------------------|--------------------------|--------------------------|
| 1                        | 2                        | 3                        | 4                        | 5                        |
| <input type="checkbox"/> | <input type="checkbox"/> | <input type="checkbox"/> | <input type="checkbox"/> | <input type="checkbox"/> |

C). Not at all enjoyable

Very enjoyable

|                          |                          |                          |                          |                          |
|--------------------------|--------------------------|--------------------------|--------------------------|--------------------------|
| 1                        | 2                        | 3                        | 4                        | 5                        |
| <input type="checkbox"/> | <input type="checkbox"/> | <input type="checkbox"/> | <input type="checkbox"/> | <input type="checkbox"/> |

D). Not in line with my food choice

In line with my food choice

|                          |                          |                          |                          |                          |
|--------------------------|--------------------------|--------------------------|--------------------------|--------------------------|
| 1                        | 2                        | 3                        | 4                        | 5                        |
| <input type="checkbox"/> | <input type="checkbox"/> | <input type="checkbox"/> | <input type="checkbox"/> | <input type="checkbox"/> |

E). Not at all important

Very important

|                          |                          |                          |                          |                          |
|--------------------------|--------------------------|--------------------------|--------------------------|--------------------------|
| 1                        | 2                        | 3                        | 4                        | 5                        |
| <input type="checkbox"/> | <input type="checkbox"/> | <input type="checkbox"/> | <input type="checkbox"/> | <input type="checkbox"/> |

6. For me eating 5 portions of fruit and vegetables per day is:

Very easy

Very difficult

|                      |                      |                      |                      |                      |
|----------------------|----------------------|----------------------|----------------------|----------------------|
| 1                    | 2                    | 3                    | 4                    | 5                    |
| <input type="text"/> | <input type="text"/> | <input type="text"/> | <input type="text"/> | <input type="text"/> |

7. For me buying fruit and vegetables is:

Very cheap

Very expensive

|                      |                      |                      |                      |                      |
|----------------------|----------------------|----------------------|----------------------|----------------------|
| 1                    | 2                    | 3                    | 4                    | 5                    |
| <input type="text"/> | <input type="text"/> | <input type="text"/> | <input type="text"/> | <input type="text"/> |

8. For me preparing and cooking fruit and vegetable is:

Very easy

Very difficult

|                      |                      |                      |                      |                      |
|----------------------|----------------------|----------------------|----------------------|----------------------|
| 1                    | 2                    | 3                    | 4                    | 5                    |
| <input type="text"/> | <input type="text"/> | <input type="text"/> | <input type="text"/> | <input type="text"/> |

9. For me finding time to eat 5 a day is:

Very easy

Very difficult

|                      |                      |                      |                      |                      |
|----------------------|----------------------|----------------------|----------------------|----------------------|
| 1                    | 2                    | 3                    | 4                    | 5                    |
| <input type="text"/> | <input type="text"/> | <input type="text"/> | <input type="text"/> | <input type="text"/> |

10. It is entirely my choice to eat 5 portions of fruit and vegetables per day

Strongly agree

Strongly disagree

|                      |                      |                      |                      |                      |
|----------------------|----------------------|----------------------|----------------------|----------------------|
| 1                    | 2                    | 3                    | 4                    | 5                    |
| <input type="text"/> | <input type="text"/> | <input type="text"/> | <input type="text"/> | <input type="text"/> |

11. My attitude towards eating 5 portions of fruit and vegetables is:

Very positive

Very negative

|                      |                      |                      |                      |                      |
|----------------------|----------------------|----------------------|----------------------|----------------------|
| 1                    | 2                    | 3                    | 4                    | 5                    |
| <input type="text"/> | <input type="text"/> | <input type="text"/> | <input type="text"/> | <input type="text"/> |

12. I think of myself as health conscious

Strongly agree

Strongly disagree

|                          |                          |                          |                          |                          |
|--------------------------|--------------------------|--------------------------|--------------------------|--------------------------|
| 1                        | 2                        | 3                        | 4                        | 5                        |
| <input type="checkbox"/> | <input type="checkbox"/> | <input type="checkbox"/> | <input type="checkbox"/> | <input type="checkbox"/> |

13. I think of myself as someone who is concerned about the consequences of what I eat

Strongly agree

Strongly disagree

|                          |                          |                          |                          |                          |
|--------------------------|--------------------------|--------------------------|--------------------------|--------------------------|
| 1                        | 2                        | 3                        | 4                        | 5                        |
| <input type="checkbox"/> | <input type="checkbox"/> | <input type="checkbox"/> | <input type="checkbox"/> | <input type="checkbox"/> |

14. My family think I should eat 5 portions of fruit and vegetables per day

Strongly agree

Strongly disagree

|                          |                          |                          |                          |                          |
|--------------------------|--------------------------|--------------------------|--------------------------|--------------------------|
| 1                        | 2                        | 3                        | 4                        | 5                        |
| <input type="checkbox"/> | <input type="checkbox"/> | <input type="checkbox"/> | <input type="checkbox"/> | <input type="checkbox"/> |

15. My friends think I should eat 5 portions of fruit and vegetable per day

Strongly agree

Strongly disagree

|                          |                          |                          |                          |                          |
|--------------------------|--------------------------|--------------------------|--------------------------|--------------------------|
| 1                        | 2                        | 3                        | 4                        | 5                        |
| <input type="checkbox"/> | <input type="checkbox"/> | <input type="checkbox"/> | <input type="checkbox"/> | <input type="checkbox"/> |

16. My doctor and midwife think I should eat 5 portions of fruit and vegetable per day

Strongly agree

Strongly disagree

|                          |                          |                          |                          |                          |
|--------------------------|--------------------------|--------------------------|--------------------------|--------------------------|
| 1                        | 2                        | 3                        | 4                        | 5                        |
| <input type="checkbox"/> | <input type="checkbox"/> | <input type="checkbox"/> | <input type="checkbox"/> | <input type="checkbox"/> |

17. Eating 5 portions of fruit and vegetable per day will reduce the chances of me getting -

Cancer      Yes       No       Don't know

Heart disease      No       Yes       Don't know

Diabetes      Don't Know       Yes       No

Obesity      Yes       Don't know       No

18. Eating 5 portions of fruit and vegetables per day while I am pregnant is good for my baby.

No       Don't know       Yes

19. How would you rate your health today?

Very good      Very poor

1      2      3      4      5

                      

20. Have you been given any advice about your diet since you became pregnant?

Yes      No

    

Please specify the advice you were given \_\_\_\_\_

\_\_\_\_\_

\_\_\_\_\_

21. Where do you find out information about diet and health?

Please tick all that you use

|                                     |  |
|-------------------------------------|--|
| <b>Magazines</b>                    |  |
| <b>TV programmes</b>                |  |
| <b>TV adverts</b>                   |  |
| <b>Medical appointments/clinics</b> |  |
| <b>Health promotion leaflets</b>    |  |
| <b>Friends</b>                      |  |
| <b>Family</b>                       |  |
| <b>Social media – like Facebook</b> |  |
| <b>Other (please specify)</b>       |  |

22. This part of the questionnaire is designed to look at how you see yourself as a person.

Please tick one box on each line that you think best describes you

| <b>I see myself as...</b>                     | <b>Disagree strongly</b> | <b>Disagree moderately</b> | <b>Disagree a little</b> | <b>Neither agree or disagree</b> | <b>Agree a little</b> | <b>Agree moderately</b> | <b>Agree strongly</b> |
|-----------------------------------------------|--------------------------|----------------------------|--------------------------|----------------------------------|-----------------------|-------------------------|-----------------------|
|                                               | <b>1</b>                 | <b>2</b>                   | <b>3</b>                 | <b>4</b>                         | <b>5</b>              | <b>6</b>                | <b>7</b>              |
| <b>Extraverted<br/>Enthusiastic</b>           |                          |                            |                          |                                  |                       |                         |                       |
| <b>Critical<br/>Quarrelsome</b>               |                          |                            |                          |                                  |                       |                         |                       |
| <b>Dependable<br/>Thorough</b>                |                          |                            |                          |                                  |                       |                         |                       |
| <b>Anxious<br/>Easily upset</b>               |                          |                            |                          |                                  |                       |                         |                       |
| <b>Open to new<br/>experience<br/>Complex</b> |                          |                            |                          |                                  |                       |                         |                       |
| <b>Reserved<br/>Quiet</b>                     |                          |                            |                          |                                  |                       |                         |                       |
| <b>Sympathetic<br/>Warm</b>                   |                          |                            |                          |                                  |                       |                         |                       |
| <b>Disorganised<br/>Careless</b>              |                          |                            |                          |                                  |                       |                         |                       |
| <b>Calm<br/>Even-tempered</b>                 |                          |                            |                          |                                  |                       |                         |                       |
| <b>Conventional<br/>Uncreative</b>            |                          |                            |                          |                                  |                       |                         |                       |
